# Supplementary material
Source: ML conference proceedings conference paper supplement (https://openaccess.thecvf.com/content/ICCV2025/html/Kang_Open-ended_Hierarchical_Streaming_ICCV_2025_paper.html)
Supplement: Supplementary file 1 [file Kang_Open-ended_Hierarchical_Streaming_ICCV_2025_supplemental.pdf]

# Open-ended Hierarchical Streaming Video Understanding with Vision Language Models

## Supplementary Material

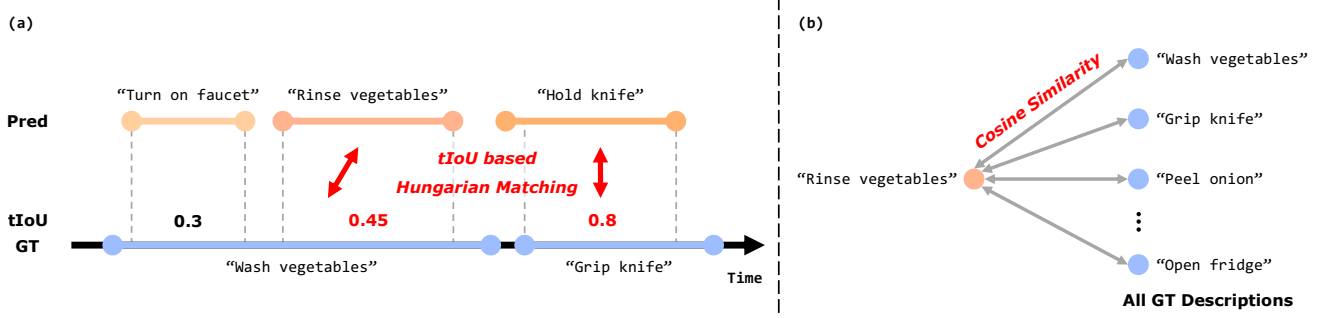

Figure 1. (a) *tIoU*-based Hungarian matching. Hungarian matching provides optimal one-to-one matching in terms of maximizing *tIoU*, unlike greedy matching which allows duplication. Here, the algorithm selects “*Rinse vegetables*” as the best match for the GT “*Wash vegetables*”. With a predefined *tIoU* threshold of 0.3, “*Rinse vegetables*” is considered a True Positive (TP), while the unmatched prediction “*Turn on faucet*” is classified as a False Positive (FP). If no prediction matches the GT or fails to meet the threshold, the instance is counted as a False Negative (FN). (b) The description “*Rinse vegetables*”, initially marked as a TP in *F1 (loc.)*, is encoded into an embedding vector. Similarly, all GT descriptions in the test split are encoded, and pairwise cosine similarities are computed. If “*Wash vegetables*” appears among the top 5 most similar GT descriptions, “*Rinse vegetables*” is confirmed as a TP.

### A. Details of Metrics

This section provides detailed explanations of the evaluation metrics presented in the main text.

#### Algorithm 1 `get_hungarian_score` in Python.

```
def get_hungarian_score(answer:list, prediction:list,
                        iou_threshold=0.5):
    """
    IN: answer[[st,ed],[st,ed]...],
        prediction[[st,ed],[st,ed]...]
    OUT: f1_score (float)
    """
    profit = np.zeros((len(answer), len(prediction)))
    #calculate pairwise iou
    for i in range(len(answer)):
        for j in range(len(prediction)):
            profit[i][j] = calculate_iou(answer[i],
                                         prediction[j])
    #perform Hungarian Matching
    r, c = optimize.linear_sum_assignment(profit,
                                         maximize=True)
    tp = np.sum(np.where(profit[r, c] >=
                        iou_threshold, 1, 0))
    a = answer.shape[0]
    p = prediction.shape[0]
    #return F1 score
    return 2*tp/(a+p)
```

**Class-agnostic F1 [*F1 (loc.)*]** Previous work [6] conducted an in-depth study on appropriate metrics for evaluating class-agnostic action proposals in a streaming setting, revealing that Hungarian F1 is an effective measure of performance. Accordingly, we use Hungarian F1 (hereafter, *F1 (loc.)*) to evaluate the streaming perception mod-

| Method      | Heir.   | CIDEr   | METEOR  |
|-------------|---------|---------|---------|
| GT Proposal | Step    | 17.7739 | 8.4363  |
|             | Substep | 32.8570 | 10.7680 |
| OpenHOUSE   | Step    | 7.1885  | 4.1640  |
|             | Substep | 14.3946 | 5.5151  |

Table 1. CIDEr, METEOR in EgoGS using evaluation tool [7].

ule. This metric employs the Hungarian matching algorithm [8], which provides optimal bipartite matching between class-agnostic ground truth  $\{(t_m^s, t_m^e)\}_{m=1}^M$  and the model’s predictions  $\{(\hat{t}_m^s, \hat{t}_m^e)\}_{m=1}^{\hat{M}}$  in terms of *tIoU*. A prediction is considered a true positive if the overlap with the matched GT exceeds a predefined *tIoU* (in our paper,  $tIoU \in \{0.3, 0.5, 0.7\}$ ) threshold. Figure 1 (a) illustrates *tIoU*-based Hungarian matching and Algorithm 1 presents a brief Python implementation for calculating *F1 (loc.)*.

**Top-k F1 [*F1 (loc. + desc.)*]** While *F1 (loc.)* only measures class-agnostic action proposals, our final output includes free-form descriptions of action instances. To account for this, we extend *F1 (loc.)* to define *F1 (loc. + desc.)*, adding a semantic relevance constraint for True Positives (TP) beyond the *tIoU* condition. First, *tIoU*-based Hungarian matching is performed, identical to *F1 (loc.)*. Predictions that pass the *tIoU* threshold are considered candidates. Each candidate prediction  $\{s_p, e_p, d_p\}$  is matched to a ground truth (GT) instance  $\{s_{gt}, e_{gt}, d_{gt}\}$  where *s* and *e* are the start and end times, and *d* represents the description. (Section 3.1)

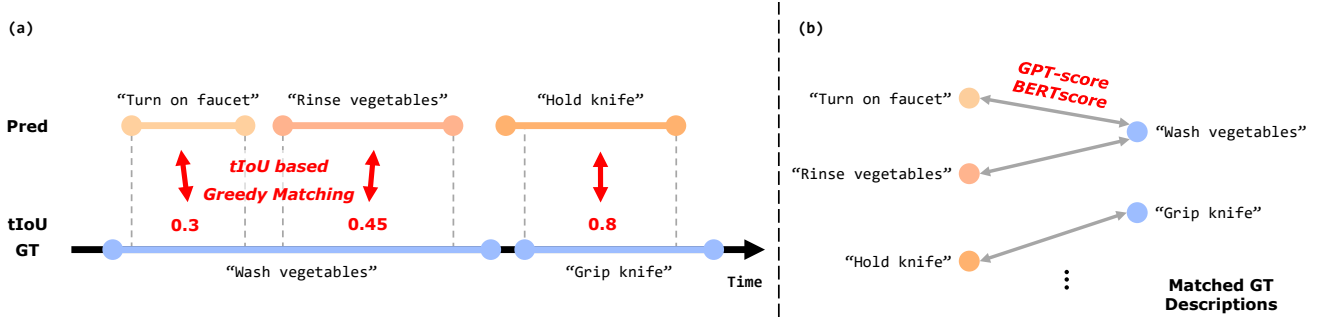

Figure 2. An example of calculating GPT, or BERTscore. With a  $tIoU$  threshold of 0.3, the predictions "Turn on faucet" and "Rinse vegetables" are matched with the GT "Wash vegetables", while "Hold knife" is matched with "Grip knife". This duplicated matching with "Wash vegetables" highlights a key difference from the Hungarian F1 metric. After matching, GPT-Score or BERTscore is computed for each matched pair, and the final score is obtained by averaging all pair scores.

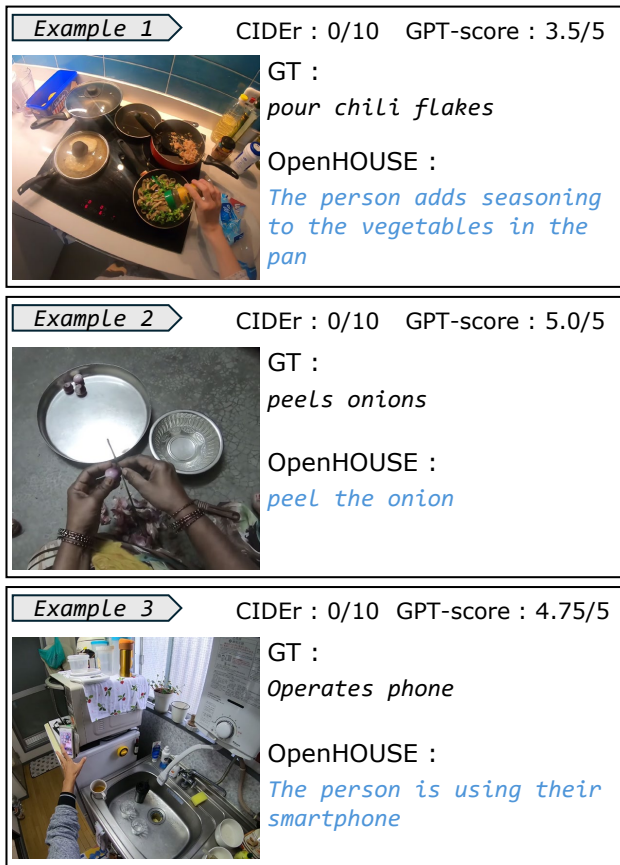

Figure 3. Examples of CIDEr [14] and GPT-Score [9] results from EgoGS dataset. Each score was computed at  $tIoU$  0.3. GPT-Score reflects the average of four semantic dimensions: CU, CO, DO, and TU.

The final step is to determine whether  $d_p$  and  $d_{gt}$  match or not. Since  $d_p$  is a free-form output from a powerful large-scale VLM, it tends to be highly detailed, making semantic relevance crucial—something traditional N-gram-based metrics fail to capture. To effectively evaluate the se-

mantic relevance of the matched prediction, we use a zero-shot evaluation approach inspired by CLIP [11]. For each matched prediction, we encode the candidate description  $d_p$  and all GT descriptions  $\{d_m\}_{m=1}^M$  using a GPT-4 [1] text encoder, where  $M$  represents the total number of GT descriptions in the whole test split. Pairwise cosine similarity is then calculated between  $d_p$  and all GT descriptions, which are subsequently ranked by similarity. If the matched  $d_{gt}$  appears in the top-k rankings, the prediction is finally classified as a TP. Figure 1 (b) provides an example of this process. For all experiment, we choose  $k = 5$  as we empirically found that at least five ground truth descriptions often share near-identical semantics.

**Description Quality Metrics** In addition to the main metrics, we use another metrics to evaluate the generated descriptions: GPT-Score [9] and BERTscore [15], as introduced in Section 4 of the main text. For GPTScore, we follow [9], scoring all true positive predictions on a 1–5 scale across the CI (Correctness of Information), DO (Detailed Orientation), CU (Contextual Understanding), and TU (Temporal Understanding) categories using GPT-3.5. The CO (Consistency) category is excluded as it is not suitable for evaluating hierarchical action descriptions. Detailed prompts used for evaluating the CI, DO, CU, and TU categories can be found in Prompt 1, 2, 3, 4. Unlike  $F1$  (*loc.*), which identifies optimal one-to-one matching between ground truth and predictions, these metrics use *greedy matching*, allowing multiple predictions to match the same ground truth. A predefined  $tIoU$  threshold is applied to filter predictions before calculating the scores.

**N-gram based metric** We found that popular N-gram-based methods (e.g. CIDEr [14]) are not suitable for evaluating the caption quality of OpenHOUSE. Since we use a powerful VLM in a zero-shot setting, it often produces detailed descriptions that may align even better with the actual action than the ground truth, but may not share the exact

---

## Prompt 1 CI Prompt for Evaluation.

---

```
role: system,
content:
  You are an intelligent chatbot designed for evaluating
  the factual accuracy of generative outputs for video
  -based question-answer pairs.
  Your task is to compare the predicted answer with the
  correct answer and determine if they are factually
  consistent. Here's how you can accomplish the task:
  -----
  ##INSTRUCTIONS:
  - Focus on the factual consistency between the predicted
    answer and the correct answer. The predicted answer
    should not contain any misinterpretations or
    misinformation.
  - The predicted answer must be factually accurate and
    align with the video content.
  - Consider synonyms or paraphrases as valid matches.
  - Evaluate the factual accuracy of the prediction
    compared to the answer.

role: user,
content:
  Please evaluate the following video-based question-answer
  pair:"
  Question: {question}
  Correct Answer: {answer}
  Predicted Answer: {pred}
  Provide your evaluation only as a factual accuracy score
  where the factual accuracy score is an integer value
  between 0 and 5, with 5 indicating the highest
  level of factual consistency.
  Please generate the response in the form of a Python
  dictionary string with keys 'score', where its value
  is the factual accuracy score in INTEGER, not
  STRING.
  DO NOT PROVIDE ANY OTHER OUTPUT TEXT OR EXPLANATION. Only
  provide the Python dictionary string.
  For example, your response should look like this: {'
  score': 4.8}.
```

---

---

## Prompt 2 DO Prompt for Evaluation.

---

```
role: system,
content:
  You are an intelligent chatbot designed for evaluating
  the detail orientation of generative outputs for
  video-based question-answer pairs.
  Your task is to compare the predicted answer with the
  correct answer and determine its level of detail,
  considering both completeness and specificity. Here'
  s how you can accomplish the task:
  -----
  ##INSTRUCTIONS:
  - Check if the predicted answer covers all major points
    from the video. The response should not leave out
    any key aspects.
  - Evaluate whether the predicted answer includes specific
    details rather than just generic points. It should
    provide comprehensive information that is tied to
    specific elements of the video.
  - Consider synonyms or paraphrases as valid matches.
  - Provide a single evaluation score that reflects the
    level of detail orientation of the prediction,
    considering both completeness and specificity.

role: user,
content:
  Please evaluate the following video-based question-answer
  pair:
  Question: {question}
  Correct Answer: {answer}
  Predicted Answer: {pred}
  Provide your evaluation only as a detail orientation
  score where the detail orientation score is an
  integer value between 0 and 5, with 5 indicating the
  highest level of detail orientation.
  Please generate the response in the form of a Python
  dictionary string with keys 'score', where its value
  is the detail orientation score in INTEGER, not
  STRING.
  DO NOT PROVIDE ANY OTHER OUTPUT TEXT OR EXPLANATION. Only
  provide the Python dictionary string.
  For example, your response should look like this: {'
  score': 4.8}.
```

---

---

## Prompt 3 CU Prompt for Evaluation.

---

```
role: system,
content:
  You are an intelligent chatbot designed for evaluating
  the contextual understanding of generative outputs
  for video-based question-answer pairs.
  Your task is to compare the predicted answer with the
  correct answer and determine if the generated
  response aligns with the overall context of the
  video content. Here's how you can accomplish the
  task:
  -----
  ##INSTRUCTIONS:
  - Evaluate whether the predicted answer aligns with the
    overall context of the video content. It should not
    provide information that is out of context or
    misaligned.
  - The predicted answer must capture the main themes and
    sentiments of the video.
  - Consider synonyms or paraphrases as valid matches.
  - Provide your evaluation of the contextual understanding
    of the prediction compared to the answer.

role: user,
content:
  Please evaluate the following video-based question-answer
  pair:
  Question: {question}
  Correct Answer: {answer}
  Predicted Answer: {pred}
  Provide your evaluation only as a contextual
  understanding score where the contextual
  understanding score is an integer value between 0
  and 5, with 5 indicating the highest level of
  contextual understanding.
  Please generate the response in the form of a Python
  dictionary string with keys 'score', where its value
  is contextual understanding score in INTEGER, not
  STRING.
  DO NOT PROVIDE ANY OTHER OUTPUT TEXT OR EXPLANATION. Only
  provide the Python dictionary string.
  For example, your response should look like this: {'
  score': 4.8}.
```

---

---

## Prompt 4 TU Prompt for Evaluation.

---

```
role: system,
content:
  You are an intelligent chatbot designed for evaluating
  the temporal understanding of generative outputs for
  video-based question-answer pairs.
  Your task is to compare the predicted answer with the
  correct answer and determine if they correctly
  reflect the temporal sequence of events in the video
  content. Here's how you can accomplish the task:
  -----
  ##INSTRUCTIONS:
  - Focus on the temporal consistency between the predicted
    answer and the correct answer. The predicted answer
    should correctly reflect the sequence of events or
    details as they are presented in the video content.
  - Consider synonyms or paraphrases as valid matches, but
    only if the temporal order is maintained.
  - Evaluate the temporal accuracy of the prediction
    compared to the answer.

role: user,
content:
  Please evaluate the following video-based question-answer
  pair:
  Question: {question}
  Correct Answer: {answer}
  Predicted Answer: {pred}
  Provide your evaluation only as a temporal accuracy score
  where the temporal accuracy score is an integer
  value between 0 and 5, with 5 indicating the highest
  level of temporal consistency.
  Please generate the response in the form of a Python
  dictionary string with keys 'score', where its value
  is the temporal accuracy score in INTEGER, not
  STRING.
  DO NOT PROVIDE ANY OTHER OUTPUT TEXT OR EXPLANATION. Only
  provide the Python dictionary string.
  For example, your response should look like this: {'
  score': 4.8}.
```

---

vocabulary with the ground truth. This is not a flaw to penalize but rather aligns with our ultimate goal of open-ended understanding. However, N-gram-based methods require exact word matches, which unjustly penalizes our more detailed descriptions.

Figure 3 illustrates some examples of this. Unlike N-gram based method (CIDEr [14]), we found that the metrics that leverage large-scale language models, such as GPT-based scoring (GPT-Score [9]), offers a more robust evaluation framework for semantic similarity. Note that our main metric,  $F1 (loc. + desc.)$ , also uses a powerful VLM’s text encoder [1] for encoding the descriptions into vector representations, effectively capturing semantic correspondence. For completeness, we provide results of N-gram based metric in Table 1.

## B. Utilization of Different VLMs

One of the key components of our system is the VLM, which generates free-form descriptions. Table 3 shows the variation in caption quality with different VLMs. The results indicate that while more advanced VLMs generally improve performance, there is a point of diminishing gains once the VLM is sufficiently powerful. This highlights the inherent complexity of Hierarchical Streaming Video Understanding; further improvements cannot rely solely on VLM advancements—enhancing the streaming module is also crucial for meaningful progress.

## C. Generating descriptions for incomplete action instances

In Section 4 of the main text, we reported results where the streaming module invoked the VLM to predict substeps and steps at the points when each action instance ended, and to predict the overall goal when the video finished. However,

| Method    | Completion | Hier.   | F1 (loc. + desc.) $\uparrow$ |       |       | Goal Acc. $\uparrow$ |
|-----------|------------|---------|------------------------------|-------|-------|----------------------|
|           |            |         | 0.3                          | 0.5   | 0.7   |                      |
| GT        | 25%        | Step    | 18.93                        | 18.93 | 18.93 | 39.55                |
|           |            | Substep | 23.66                        | 23.66 | 23.66 |                      |
|           | 50%        | Step    | 24.56                        | 24.56 | 24.56 | 45.52                |
|           |            | Substep | 28.52                        | 28.52 | 28.52 |                      |
|           | 75%        | Step    | 26.53                        | 26.53 | 26.53 | 47.76                |
|           |            | Substep | 31.78                        | 31.78 | 31.78 |                      |
|           | 100%       | Step    | 28.68                        | 28.68 | 28.68 | 47.01                |
|           |            | Substep | 33.12                        | 33.12 | 33.12 |                      |
| OpenHouse | 25%        | Step    | 9.68                         | 7.86  | 5.36  | 44.03                |
|           |            | Substep | 13.55                        | 11.14 | 8.05  |                      |
|           | 50%        | Step    | 12.84                        | 10.66 | 7.45  | 42.54                |
|           |            | Substep | 16.99                        | 13.93 | 9.91  |                      |
|           | 75%        | Step    | 14.36                        | 12.02 | 8.38  | 45.52                |
|           |            | Substep | 18.8                         | 15.41 | 10.66 |                      |
|           | 100%       | Step    | 15.23                        | 12.67 | 8.680 | 47.76                |
|           |            | Substep | 19.79                        | 16.11 | 10.89 |                      |

Table 2. Experiments on EgoGS validating description generation for incomplete action instances.

in real world scenarios, it is crucial to generate predictions even when an action instance or video is still in progress.

Thus, in this section, we present the prediction results for substep instances, step instances, and the entire video at various completion stages: 25%, 50%, 75%, and 100%. This analysis aims to demonstrate the OpenHOUSE’s ability to provide reliable predictions for substeps, steps, and goals even before an action instance or the entire video reaches completion.

Table 2 presents the VLM inference results on both ground truth (GT) temporal annotations and those generated by the OpenHOUSE streaming module at different completion stages. While there is a clear trend of improved performance with increased observation, the results at 50% completion show only slight degradation compared to full observation. Note that we only have 134 test samples for goal accuracy, so a single correct or incorrect prediction can lead to approximately a 1% fluctuation in performance, explaining the observed perturbations.

These findings highlight that OpenHOUSE can provide reliable inferences even when only partial information is available, emphasizing the potential of OpenHOUSE in real-world, online scenarios where actions are often incomplete.

## D. Dataset Analysis

In Section D, we aim to discuss the comparison between the Ego4D GoalStep (EgoGS) dataset and the Ego4D GoalStep pseudo (EgoGS pseudo) dataset generated through our dataset generation pipeline. Additionally, we provide statistics on the reconstructed hierarchical datasets, including Ego-Exo4D Keystep (EgEx) and Epic-Kitchens 100 (EK100).

**Comparison between EgoGS and EgoGS pseudo** Figure 4 (a) illustrates a comparison of step segment durations between EgoGS and EgoGS pseudo. The step segment duration for EgoGS averages 50.69 seconds, slightly differing from the original value reported in the Ego4D GoalStep dataset [12] because only the train and validation data, excluding the test dataset, were used for this calculation. EgoGS pseudo has an average step segment duration of 46.08 seconds, which is similar to EgoGS. Additionally, the overall distribution of step segment durations for EgoGS pseudo aligns well with that of EgoGS. This demonstrates that the dataset generated through our pipeline effectively approximates the original dataset.

**Dataset Statistics** Figure 4 (b), (c), (d) respectively illustrate the distributions of goal, step, and substep segment durations for EgoGS pseudo, EgEx, and EK100. The goal, step, and substep segments of EgoGS pseudo have average durations of 1532.32 seconds, 46.08 seconds, and 22.44 seconds, respectively. For EgEx, the goal, step, and substep segments have average durations of 308.09 seconds, 32.69

| Model                 | Hier.   | F1 (loc. + cap.) $\uparrow$ |       |       | GPT-Score $\uparrow$ [9] |       |       |       | BERTScore $\uparrow$ [15] |
|-----------------------|---------|-----------------------------|-------|-------|--------------------------|-------|-------|-------|---------------------------|
|                       |         | 0.3                         | 0.5   | 0.7   | CI                       | DO    | CU    | TU    |                           |
| GPT-4o [10]           | Step    | 15.53                       | 12.65 | 8.59  | 3.33                     | 2.688 | 3.559 | 2.852 | 0.857                     |
|                       | Substep | 19.51                       | 16.15 | 11.19 | 3.027                    | 2.595 | 3.336 | 2.706 | 0.866                     |
| InternVL2-40B-AWQ [3] | Step    | 15.23                       | 12.67 | 8.68  | 3.192                    | 2.606 | 3.381 | 2.670 | 0.858                     |
|                       | Substep | 19.79                       | 16.11 | 10.89 | 2.869                    | 2.559 | 3.164 | 2.543 | 0.873                     |
| InternVL2-8B [3]      | Step    | 10.01                       | 8.21  | 5.49  | 2.791                    | 2.374 | 3.053 | 2.222 | 0.843                     |
|                       | Substep | 13.09                       | 10.65 | 7.57  | 2.245                    | 2.248 | 2.644 | 1.978 | 0.862                     |

Table 3. Experimental results on the EgoGS dataset using different VLMs. Here, CI, DO, CU, TU in GPT-Score refer to ‘‘Correctness of Information’’, ‘‘Detail Orientation’’, ‘‘Contextual Understanding’’, ‘‘Temporal Understanding’’ respectively.

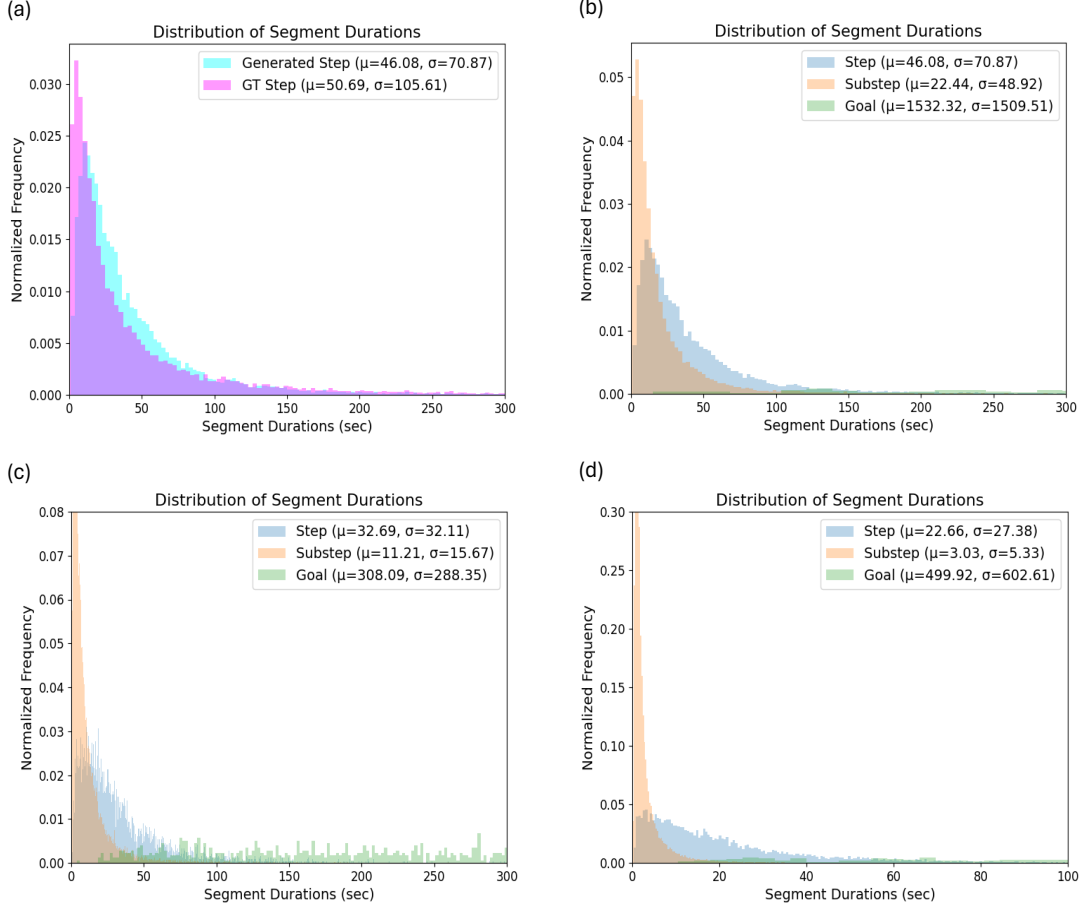

Figure 4. Dataset statistics

seconds, and 11.21 seconds, respectively. The goal, step, and substep segments of EK100 have average durations of 499.92 seconds, 22.66 seconds, and 3.03 seconds, respectively.

**Human Validators in Dataset Generation** Five human annotators participated in the dataset annotation and validation process. Each annotator contributed approximately 20 hours of work and was compensated \$200.

## E. VLM inference details

In section E, we describe the details of the inference process for each level in the hierarchy: *substep*, *step*, and *goal*, using VLM. Additionally, we provide comprehensive details regarding inference speed measurement

**Substep Inference** Each *substep* is inferred using the following inputs: (i) video frames sampled at 1-second intervals from the corresponding *substep* instance, and (ii) text predictions from prior *substeps* within the same step. With these inputs, predictions are made using the prompt 7. The generated short form response serves as the prediction re-

---

**Prompt 5 Goal Prompt for VLM inference.**

---

I am planning to add annotations to a video. The annotations form a three-level hierarchy: goal, steps, and substeps. Here are the specific requirements:

1. Goal Annotation: There is only one goal annotation for the entire video.
2. Step Annotations: Each step annotation is ordered chronologically and must follow the completion of all substeps within the previous step. For example, Step 2 cannot begin until all substeps of Step 1 are completed.
3. Substep Annotations: These are specific parts of the video that detail the actions within each step.

Given an image sequence extracted from a video, predict the most appropriate goal for the video based on the frames from each step and the short form responses for each step.

The short form responses of the steps are provided as a time-ordered list in text format, where the 0th index is the earliest step and higher indices represent more recent steps.

Utilize this context to predict the overall goal of the video.

Generate a response:  
The response should consist of a single sentence that succinctly describes the goal.

Use the following list of short form responses for each step (in text format and time-ordered):  
Short form response of step: {short\_form\_step}

Output format must be:  
Answer: (goal)

---

---

**Prompt 6 Step Prompt for VLM inference.**

---

I am planning to add annotations to a video. The annotations form a three-level hierarchy: goal, steps, and substeps. Here are the specific requirements:

1. Goal Annotation: There is only one goal annotation for the entire video.
2. Step Annotations: Each step annotation is ordered chronologically and must follow the completion of all substeps within the previous step. For example, Step 2 cannot begin until all substeps of Step 1 are completed.
3. Substep Annotations: These are specific parts of the video that detail the actions within each step.

Given an image sequence extracted from a video clip, predict the most appropriate step occurring in the clip based on the sequence and the previous steps.

The previous steps are provided as a time-ordered list of long form responses in text format, where the 0th index is the earliest step and higher indices represent more recent steps.

If there are no previous steps, the list will be empty. If there are more than 10 previous steps, only the 10 most recent responses will be provided. Utilize this context to improve the prediction for the current step.

First, Generate two types of responses:  
Short form response: A single sentence that succinctly describes the step.

Long form response: A detailed and accurate description of the step based on the image sequence, considering the previous steps if provided.

After generating the responses, revise the long form response to ensure it aligns with the short form response for consistency.

Use the following list of previous long form responses in text format to ensure continuity and logical progression (the list may be empty if there are no prior steps, and a maximum of the 10 most recent responses will be provided):  
Previous long form response: {prediction\_list}

Output format must be:  
Answer:  
short form response: (response)  
long form response (before revision): (response)  
long form response (after revision): (response)

---

---

**Prompt 7 Substep Prompt for VLM inference.**

---

I am planning to add annotations to a video. The annotations form a three-level hierarchy: goal, steps, and substeps. Here are the specific requirements:

1. Goal Annotation: There is only one goal annotation for the entire video.
2. Step Annotations: Each step annotation is ordered chronologically and must follow the completion of all substeps within the previous step. For example, Step 2 cannot begin until all substeps of Step 1 are completed.
3. Substep Annotations: These are specific parts of the video that detail the actions within each step.

Given an image sequence extracted from a video clip, predict the most appropriate substep occurring in the clip based on the sequence and the previous substeps of the current step.

The previous substeps are provided as a time-ordered list of long form responses in text format, where the 0th index is the earliest substep and higher indices represent more recent substeps.

If there are no previous substeps, the list will be empty. Utilize this context to improve the prediction for the current substep.

First, Generate two types of responses:  
Short form response: A single sentence that succinctly describes the substep.

Long form response: A detailed and accurate description of the substep based on the image sequence, considering the previous substeps if provided.

After generating the responses, revise the long form response to ensure it aligns with the short form response for consistency.

Use the following list of previous long form responses in text format to ensure continuity and logical progression (the list may be empty if there are no prior substeps):  
Previous long form response: {prediction\_list}

Output format must be:  
Answer:  
short form response: (response)  
long form response (before revision): (response)  
long form response (after revision): (response)

---

sult, while the long form response (after revision) is used as input for predicting the next *substep*.

**Step Inference** For step-level inference, the input consists of: (i) images sampled from the *substep* instances within the given *step* at 3.3-second intervals, and (ii) text predictions from up to 10 previous *steps*. With these inputs, predictions are made using the prompt 6. Again, the short form response represents the prediction result, while the long form response (after revision) is employed to predict the subsequent *step*.

**Goal Inference** *Goal* inference utilizes: (i) a single image per *step*, and (ii) text predictions from all the *steps*. With these inputs, predictions are made using the prompt 5.

**Inference Speed Measurement Details** As discussed in Section 4.2, we evaluated the inference speed of a video with 2758 \* 16 frames (46 minutes at 16 fps) using the Intern VL2-40B-AWQ [3] model. The measurement was conducted utilizing 4 \* RTX 3090 GPUs. The measured FPS represents the model’s average processing FPS.

Following the technical details in [2], the reported 24 FPS includes the *entire OpenHOUSE pipeline*, encompassing: (i) online feature extraction from raw frames, (ii) Streaming Module inference, and (iii) VLM inference.



## F. Implementation Details

As discussed in Section 3.3.1 of the main paper, our Streaming Module consists of three heads: a state-emitting head, a progression head for steps, and a progression head for substeps. Each head shares an RNN backbone comprising three recurrent layers with a hidden state size of 768.

The state-emitting head is trained using the standard cross-entropy loss, following the approach in [6]. The progression heads for both steps and substeps are trained using the histogram loss described in [4], configured with 10 bins and a standard deviation ( $\sigma$ ) of 0.15.

We trained using AdamW optimizer with a learning rate of  $3e-4$ , a batch size of 16, and a weight decay of 0.01. The model is trained for a total of 30 epochs.

## G. Streaming Module Comparison

Since our streaming module is based on the ActionSwitch [6] design, we conducted apple-to-apple evaluations on EK-100 against various class-agnostic On-TAL baselines. (Table 4). Key observations are: (i) Streaming Module (SM) without hybrid detection performs comparably to ActionSwitch, validating our design choice, (ii) SM with hybrid strategy significantly outperforms prior methods, setting a new SOTA in class-agnostic On-TAL. These results further confirm the effectiveness and superiority of our hybrid action boundary detection method.

| Method                | F1@0.5        | Precision@0.5 | Recall@0.5    |
|-----------------------|---------------|---------------|---------------|
| CAG-QIL [5]           | 23.117        | 21.347        | 25.206        |
| SimOn [13]            | 4.395         | 2.351         | 33.481        |
| OAD-Grouping [5]      | 21.416        | 25.533        | 18.442        |
| ActionSwitch [6]      | 32.444        | 29.858        | 35.519        |
| SM w/o Hybrid         | 31.459        | 38.689        | 26.506        |
| <b>SM (OpenHOUSE)</b> | <b>48.954</b> | <b>48.172</b> | <b>49.763</b> |

Table 4. SM(Streaming Module) comparison in EK100 (Class-agnostic metrics)

## References

- [1] Josh Achiam, Steven Adler, Sandhini Agarwal, Lama Ahmad, Ilge Akkaya, Florencia Leoni Aleman, Diogo Almeida, Janko Altenschmidt, Sam Altman, Shyamal Anadkat, et al. Gpt-4 technical report. *arXiv preprint arXiv:2303.08774*, 2023. 2, 4
- [2] Joungbin An, Hyolim Kang, Su Ho Han, Ming-Hsuan Yang, and Seon Joo Kim. Miniroad: Minimal rnn framework for online action detection. In *IEEE/CVF International Conference on Computer Vision (ICCV)*, 2023. 6
- [3] Zhe Chen, Weiyun Wang, Hao Tian, Shenglong Ye, Zhangwei Gao, Erfei Cui, Wenwen Tong, Kongzhi Hu, Jiapeng Luo, Zheng Ma, et al. How far are we to gpt-4v? closing the gap to commercial multimodal models with open-source suites. *arXiv preprint arXiv:2404.16821*, 2024. 5, 6
- [4] Jesse Farebrother, Jordi Orbay, Quan Vuong, Adrien Ali Taiga, Yevgen Chebotar, Ted Xiao, Alex Irpan, Sergey Levine, Pablo Samuel Castro, Aleksandra Faust, et al. Stop regressing: Training value functions via classification for scalable deep rl. *arXiv preprint arXiv:2403.03950*, 2024. 7
- [5] Hyolim Kang, Kyungmin Kim, Yumin Ko, and Seon Joo Kim. Cag-qil: Context-aware actionness grouping via q imitation learning for online temporal action localization. In *IEEE/CVF International Conference on Computer Vision (ICCV)*, 2021. 7
- [6] Hyolim Kang, Jungsuk Hyun, Joungbin An, Youngjae Yu, and Seon Joo Kim. Actionswitch: Class-agnostic detection of simultaneous actions in streaming videos. In *European Conference on Computer Vision (ECCV)*, 2024. 1, 7
- [7] Ranjay Krishna, Kenji Hata, Frederic Ren, Li Fei-Fei, and Juan Carlos Niebles. Dense-captioning events in videos. In *Proceedings of the IEEE international conference on computer vision*, pages 706–715, 2017. 1
- [8] Harold W Kuhn. The hungarian method for the assignment problem. *Naval research logistics quarterly*, 1955. 1
- [9] Muhammad Maaz, Hanoona Rasheed, Salman Khan, and Fahad Shahbaz Khan. Video-chatgpt: Towards detailed video understanding via large vision and language models. *arXiv preprint arXiv:2306.05424*, 2023. 2, 4, 5
- [10] OpenAI. Hello gpt-4o, 2024. 5
- [11] Alec Radford, Jong Wook Kim, Chris Hallacy, Aditya Ramesh, Gabriel Goh, Sandhini Agarwal, Girish Sastry, Amanda Askell, Pamela Mishkin, Jack Clark, et al. Learning transferable visual models from natural language supervision. In *International Conference on Machine Learning (ICML)*, 2021. 2
- [12] Yale Song, Eugene Byrne, Tushar Nagarajan, Huiyu Wang, Miguel Martin, and Lorenzo Torresani. Ego4d goal-step: Toward hierarchical understanding of procedural activities. *Advances in Neural Information Processing Systems*, 2024. 4
- [13] Tuan N Tang, Jungin Park, Kwonyoung Kim, and Kwanghoon Sohn. Simon: A simple framework for online temporal action localization. *arXiv preprint arXiv:2211.04905*, 2022. 7
- [14] Ramakrishna Vedantam, C Lawrence Zitnick, and Devi Parikh. Cider: Consensus-based image description evaluation. In *IEEE/CVF Conference on Computer Vision and Pattern Recognition (CVPR)*, 2015. 2, 4
- [15] Tianyi Zhang, Varsha Kishore, Felix Wu, Kilian Q Weinberger, and Yoav Artzi. Bertscore: Evaluating text generation with bert. *arXiv preprint arXiv:1904.09675*, 2019. 2, 5
